# Supplementary material for: Human SRD5A1 as a case of gene expression indel-resistance in triple-coding region
Source: Genome Biol. 2026 May 18;27:219. doi: 10.1186/s13059-026-04106-x (PMC13352861; doi:10.1186/s13059-026-04106-x)
Supplement: Supplementary file 6 — Additional file 6: Table S7. Raw data for absolute luciferase reporter readouts. [file 13059_2026_4106_MOESM6_ESM.xlsx]

## Sheet: replicate1
		FF																					Nano
	A	25160	13587	24977	16651	27599	X	X	35200	25726	24274	27787	24433	A	2024-03-22 10:04:38	A	74984	68534	85086	76713	544514	X	X	7937935	2568505	2640315	2720004	2449608
	B	27061	17530	16627	26037	24381	X	X	24365	22126	29231	27390	20223	B	2024-03-22 10:04:38	B	139926	130604	132245	150310	533991	X	X	6227090	2346906	3036277	2700278	2521624
	C	40851	30297	39463	29432	27450	X	X	24914	18165	19938	14864	13800	C	0	C	150542	158400	139785	146184	473847	X	X	6054054	1749916	2077484	1768355	1640724
	D	27412	28320	40723	32846	31714	X	X	31753	19206	18266	15808	14712	D	50	D	178455	184700	147304	144098	484115	X	X	9147521	3145091	2197981	2229172	2093052
	E	26911	37828	45348	37981	X	X	X	X	14672	18825	15750	14581	E	333	E	193429	251268	235615	207262	X	X	X	X	2410990	2291555	2782476	1970492
	F	28536	28482	34135	37718	X	X	X	X	17979	15018	15532	13534	F	2	F	314294	298171	340576	326628	X	X	X	X	2540904	2031248	2226888	1754331
	G	37831	24271	36662	24699	X	X	X	X	15259	16425	13856	12762	G	10	G	127776	101764	126024	110122	X	X	X	X	1415112	1441246	1485883	1442254
	H	18890	23344	33274	26585	X	X	X	X	21621	18519	13628	11818	H	first, try counts	H	204623	214576	238961	238452	X	X	X	X	3652373	3277484	2287429	2038091
		SUSA								HEK							SUSA								HEK
	723 nc	18890	23344	33274	26585					21621	18519	13628	11818			723 nc	204623	214576	238961	238452					3652373	3277484	2287429	2038091
	723 1	26911	37828	45348	37981					14672	18825	15750	14581			723 1	193429	251268	235615	207262					2410990	2291555	2782476	1970492
	723 5	27061	17530	16627	26037					22126	29231	27390	20223			723 5	139926	130604	132245	150310					2346906	3036277	2700278	2521624
	724 nc	37831	24271	36662	24699					15259	16425	13856	12762			724 nc	127776	101764	126024	110122					1415112	1441246	1485883	1442254
	724 1	27412	28320	40723	32846					19206	18266	15808	14712			724 1	178455	184700	147304	144098					3145091	2197981	2229172	2093052
	724 5	25160	13587	24977	16651					25726	24274	27787	24433			724 5	74984	68534	85086	76713					2568505	2640315	2720004	2449608
	725 nc	28536	28482	34135	37718					17979	15018	15532	13534			725 nc	314294	298171	340576	326628					2540904	2031248	2226888	1754331
	725 1	40851	30297	39463	29432					18165	19938	14864	13800			725 1	150542	158400	139785	146184					1749916	2077484	1768355	1640724
	725 5	27599	24381	27450	31714					35200	24365	24914	31753			725 5	544514	533991	473847	484115					7937935	6227090	6054054	9147521
		SUSA															HEK
								Average	SD															Average	SD
	723 nc	10.8323	9.19191	7.18161	8.96942		2nd atg	9.04382	1.29365							723 nc	168.927	176.98	167.848	172.457			2nd atg	171.553	3.56679
	723 1	7.18773	6.64238	5.19571	5.45699		2nd atg	6.1207	0.822621							723 1	164.326	121.729	176.665	135.141			2nd atg	149.465	21.9951
	723 5	5.17076	7.45031	7.95363	5.77294		2nd atg	6.58691	1.14907							723 5	106.07	103.872	98.5863	124.691			2nd atg	108.305	9.84377
	724 nc	3.37755	4.19282	3.43746	4.45856		3rd atg	3.8666	0.469089							724 nc	92.7395	87.7471	107.238	113.012			3rd atg	100.184	10.3004
	724 1	6.51011	6.52189	3.61722	4.38708		3rd atg	5.25907	1.28607							724 1	163.756	120.332	141.015	142.268			3rd atg	141.843	15.3603
	724 5	2.98029	5.04409	3.40657	4.60711		3rd atg	4.00951	0.844143							724 5	99.8408	108.771	97.8876	100.258			3rd atg	101.689	4.18547
	725 nc	11.0139	10.4688	9.97733	8.65974		1st atg	10.0299	0.87193							725 nc	141.326	135.254	143.374	129.624			1st atg	137.395	5.38927
	725 1	3.68515	5.22824	3.54218	4.96684		1st atg	4.3556	0.749379							725 1	96.3345	104.197	118.969	118.893			1st atg	109.598	9.73784
	725 5	19.7295	21.9019	17.2622	15.265		1st atg	18.5397	2.50378							725 5	225.51	255.575	242.998	288.084			1st atg	253.042	22.876
			NC	eIF1	eIF5				NC	eIF1	eIF5									NC	eIF1	eIF5				NC	eIF1	eIF5
		1st AUG	10.0299	4.3556	18.5397			1st AUG	0.87193	0.749379	2.50378								1st AUG	137.395	109.598	253.042			1st AUG	5.38927	9.73784	22.876
		2nd AUG	9.04382	6.1207	6.58691			2nd AUG	1.29365	0.822621	1.14907								2nd AUG	171.553	149.465	108.305			2nd AUG	3.56679	21.9951	9.84377
		3rd AUG	3.8666	5.25907	4.00951			3rd AUG	0.469089	1.28607	0.844143								3rd AUG	100.184	141.843	101.689			3rd AUG	10.3004	15.3603	4.18547

## Sheet: replicate2
	FF																NanoLuc
723 nc	32741	34950	36395	25114					37514	30002	37554	30575			723 nc		2373898	3099096	2934968	2345046	X	X	X	X	374556	369837	344022
723 1	20086	18771	20375	23993	X	X	X	X	26534	27392	18299	29704			723 1		3150715	2796848	3706378	4753560	X	X	X	X	324080	358892	331097
723 5	30116	23016	30505	28310					15424	14155	12070	14671			723 5		3953710	2531517	4088340	3628086					236915	226755	228180
724 nc	19824	22757	20862	21500	X	X	X	X	28033	25200	42161	42625			724 nc		1355101	1954025	1528852	2032424	X	X	X	X	204200	204255	212311
724 1	16961	22503	19082	18694					31126	28835	28821	32697			724 1		2393928	3783094	3216098	2800570					226915	302191	257385
724 5	33690	30195	31647	35452					15252	15539	13607	23530			724 5		3465004	3532864	2993123	4316887					163278	187953	141820
725 nc	20994	23772	28776	25800	X	X	X	X	39457	22861	35668	28768			725 nc		3053453	3279646	4431124	3607730	X	X	X	X	470343	426942	572314
725 1	20395	23285	19574	22487					32001	21149	22546	35178			725 1		2514742	2728788	2128454	2639439					188420	199765	211958
725 5	28477	31720	32019	41414					22716	29336	28520	32452			725 5		7542899	8303605	7801242	12487939					765999	890522	999145
																												375481
																												324012
	HEK						Average	SD											SUSA						Average	SD		237421
																												232535
723 nc	72.5054	88.6723	80.6421	93.376		2nd atg	83.7989	7.95269										723 nc	9.98443	12.3271	9.16073	12.2807		2nd atg	10.9382	1.39645		316011
723 1	156.861	148.998	181.908	198.123		2nd atg	171.473	19.6069										723 1	12.2138	13.1021	18.0937	10.908		2nd atg	13.5794	2.72067		156151
723 5	131.283	109.989	134.022	128.156		2nd atg	125.862	9.39638										723 5	15.3602	16.0194	18.9047	16.183		2nd atg	16.6168	1.35635		543426
724 nc	68.3566	85.8648	73.2841	94.5313		3rd atg	80.5092	10.3101										724 nc	7.28427	8.10536	5.03572	5.45537		3rd atg	6.47018	1.26729		212643
724 1	141.143	168.115	168.541	149.811		3rd atg	156.903	11.8303										724 1	7.29021	10.48	8.93047	9.66483		3rd atg	9.09138	1.1755		1055395
724 5	102.85	117.002	94.5784	121.767		3rd atg	109.049	10.8723										724 5	10.7054	12.0956	10.4226	6.63625		3rd atg	9.96494	2.02345
725 nc	145.444	137.963	153.987	139.834		1st atg	144.307	6.2299										725 nc	11.9204	18.6756	16.0456	18.8899		1st atg	16.3829	2.80933
725 1	123.302	117.191	108.739	117.376		1st atg	116.652	5.18782										725 1	5.88794	9.4456	9.40114	6.04477		1st atg	7.69486	1.72947
725 5	264.877	261.778	243.644	301.539		1st atg	267.96	21.0151										725 5	33.7207	30.3559	35.0331	32.5217		1st atg	32.9079	1.72038
		NC	eIF1	eIF5				NC	eIF1	eIF5									NC	eIF1	eIF5				NC	eIF1	eIF5
	1st AUG	144.307	116.652	267.96			1st AUG	6.2299	5.18782	21.0151								1st AUG	16.3829	7.69486	32.9079			1st AUG	2.80933	1.72947	1.72038
	2nd AUG	83.7989	171.473	125.862			2nd AUG	7.95269	19.6069	9.39638								2nd AUG	10.9382	13.5794	16.6168			2nd AUG	1.39645	2.72067	1.35635
	3rd AUG	80.5092	156.903	109.049			3rd AUG	10.3101	11.8303	10.8723								3rd AUG	6.47018	9.09138	9.96494			3rd AUG	1.26729	1.1755	2.02345

## Sheet: replicate3
		FF																NanoLuc
nc 723	A	68515	84004	78432	93164	X	X	X	X	8411	8614	9538	7325	A		nc 723	A	4227589	4384950	4033591	4778741					92159	95669	105496	113724
nc 724	B	74967	92308	86771	90958	X	X	X	X	5209	7542	8526	10007	B		nc 724	B	2749911	2839788	2770140	3236277					40511	38406	56228	52076
nc725	C	76987	107042	146226	130586	X	X	X	X	8944	8344	8231	5583	C		nc725	C	4814100	4763340	5533604	5767168					139013	123973	124615	125033
1 723	D	63400	105742	97626	108897	X	X	X	X	8895	8972	12275	10212	D		1 723	D	5200906	5279910	5367126	4826904					97906	95408	107230	113542
1 724	E	70530	90231	94441	110575					8065	15366	7922	16631	E		1 724	E	5050456	5831746	4233090	5745760					65313	61868	57077	73611
1 725	F	65562	107838	83414	105433					8386	12048	13089	8905	F		1 725	F	3199663	3032028	2163218	3247993					89143	95792	105012	102908
5 723	G	119776	161195	154111	169500					9104	17576	3572	7146	G		5 723	G	5176791	5097315	5918718	6321011					100072	109562	83481	100663
5 724	H	139126	175431	168550	168929					8390	5340	6213		H		5 724	H	6804544	8409784	6454673	7314783					53249	54596	40194	44515
5 725		172256	192085	187505	208392					9000	5711	8511	9162			5 725		15684182	17157690	17446542	23453350					204506	223078	237359	244784
723 nc		68515	84004	78432	93164	X	X	X	X	8411	8614	9538	7325			723 nc		4227589	4384950	4033591	4778741					92159	95669	105496	113724
723 1		63400	105742	97626	108897	X	X	X	X	8895	8972	12275	10212			723 1		5200906	5279910	5367126	4826904					97906	95408	107230	113542
723 5		119776	161195	154111	169500					9104	17576	3572	7146			723 5		5176791	5097315	5918718	6321011					100072	109562	83481	100663
724 nc		74967	92308	86771	90958	X	X	X	X	5209	7542	8526	10007			724 nc		2749911	2839788	2770140	3236277					40511	38406	56228	52076
724 1		70530	90231	94441	110575					8065	15366	7922	16631			724 1		5050456	5831746	4233090	5745760					65313	61868	57077	73611
724 5		139126	175431	168550	168929					8390	5340	6213				724 5		6804544	8409784	6454673	7314783					53249	54596	40194	44515
725 nc		76987	107042	146226	130586	X	X	X	X	8944	8344	8231	5583			725 nc		4814100	4763340	5533604	5767168					139013	123973	124615	125033
725 1		65562	107838	83414	105433					8386	12048	13089	8905			725 1		3199663	3032028	2163218	3247993					89143	95792	105012	102908
725 5		172256	192085	187505	208392					9000	5711	8511	9162			725 5		15684182	17157690	17446542	23453350					204506	223078	237359	244784
		HEK						Average	SD
723 nc		61.7031	52.1993	51.4279	51.2939		2nd atg	54.156	4.37099							723 nc		10.957	11.1062	11.0606	15.5255		2nd atg	12.1623	1.94247
723 1		82.0332	49.932	54.9764	44.3254		2nd atg	57.8168	14.4801							723 1		11.0069	10.634	8.73564	11.1185		2nd atg	10.3737	0.962623
723 5		43.2206	31.622	38.4056	37.2921		2nd atg	37.6351	4.1251							723 5		10.9921	6.23361	23.3709	14.0866		2nd atg	13.6708	6.26005
724 nc		36.6816	30.7643	31.9247	35.5799		3rd atg	33.7376	2.45909							724 nc		7.77712	5.09228	6.59489	5.20396		3rd atg	6.16706	1.10205
724 1		71.6072	64.6313	44.8226	51.9626		3rd atg	58.2559	10.4757							724 1		8.09833	4.02629	7.20487	4.42613		3rd atg	5.93891	1.74731
724 5		48.9092	47.9378	38.2953	43.3009		3rd atg	44.6108	4.21743							724 5		6.34672	10.224	6.46934			3rd atg	7.68001	1.79955
725 nc		62.5313	44.4997	37.8428	44.1638		1st atg	47.2594	9.20737							725 nc		15.5426	14.8577	15.1397	22.3953		1st atg	16.9838	3.13378
725 1		48.8036	28.1165	25.9335	30.8062		1st atg	33.415	9.05072							725 1		10.63	7.95086	8.02292	11.5562		1st atg	9.53999	1.58745
725 5		91.0516	89.3234	93.0457	112.544		1st atg	96.4913	9.36139							725 5		22.7229	39.0611	27.8885	26.7173		1st atg	29.0975	6.06292
			NC	eIF1	eIF5				NC	eIF1	eIF5						NC	eIF1	eIF5				NC	eIF1	eIF5
		1st AUG	47.2594	33.415	96.4913			1st AUG	9.20737	9.05072	9.36139					1st AUG	16.9838	9.53999	29.0975			1st AUG	3.13378	1.58745	6.06292
		2nd AUG	54.156	57.8168	37.6351			2nd AUG	4.37099	14.4801	4.1251					2nd AUG	12.1623	10.3737	13.6708			2nd AUG	1.94247	0.962623	6.26005
		3rd AUG	33.7376	58.2559	44.6108			3rd AUG	2.45909	10.4757	4.21743					3rd AUG	6.16706	5.93891	7.68001			3rd AUG	1.10205	1.74731	1.79955
